# Supplementary material
Source: PubMed Central journal article supplement (PMC3911597)
Supplement: JVI.02321-13_zjv999098556so1.pdf [file JVI.02321-13_zjv999098556so1.pdf]

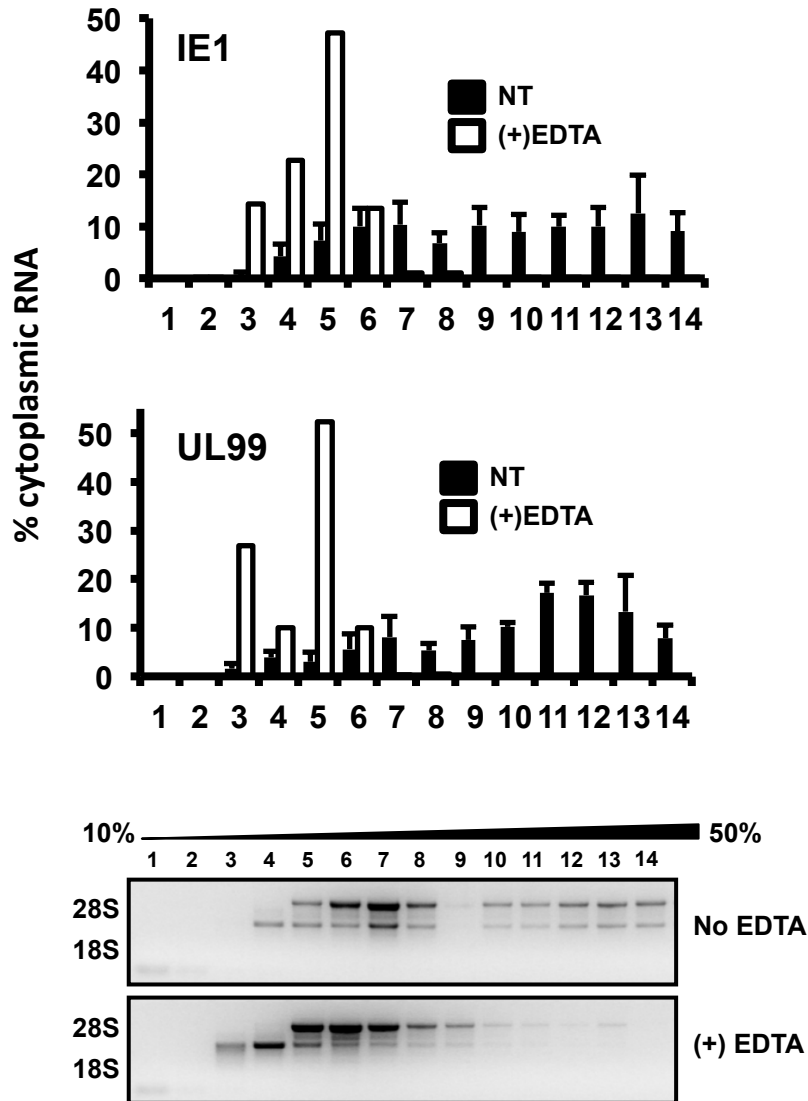

**Figure S1. EDTA treatment alters the migration of HCMV mRNAs in a sucrose density gradient.** Cytoplasmic lysates were harvested from HCMV infected cells at 96 hpi. EDTA (50 mM) was added to the lysates prior to resolution through a sucrose density gradient (open bars). The relative distribution of the IE1 and UL99 mRNAs throughout the gradient was determined by qRT-PCR as in figure 6A. The results are representative of two independent experiments. The data for the untreated samples is the same as that presented in figure 7A, and is included here for comparison. The results of a representative experiment are shown. B) Distribution of ribosomal RNAs (18S and 28S) across sucrose gradients in the presence and absence of EDTA. The results are representative of two independent experiments.

**A.**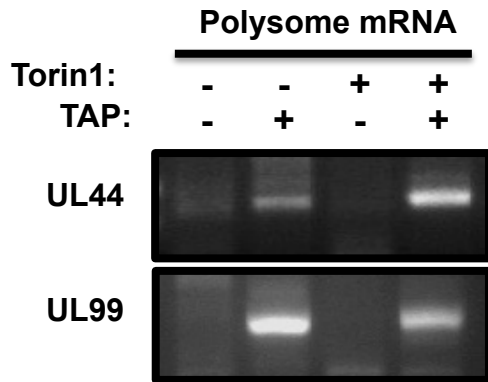**B.**

| Viral | $\Delta G$<br>(kcal/mol) |
|-------|--------------------------|
| IE1   | -43.1                    |
| UL44  | -14                      |
| UL99  | -76.1                    |
| Host  |                          |
| HSP90 | -21                      |
| RACK1 | -44.9                    |
| RPS20 | -43.2                    |

**Figure S2. HCMV polysome-associated mRNAs are capped and are predicted to have comparable secondary structure to host mRNAs.** A) Total polysome associated RNA was isolated from untreated or Torin1-treated HCMV infected cells at 96 hpi. The RNA was treated with calf intestinal phosphatase followed by tobacco acid pyrophosphatase (TAP) as indicated. An RNA oligonucleotide was then ligated to the 5' end of the RNA and 5'RACE was performed using a gene specific primer and a primer specific the RNA oligo. PCR products were resolved on 2% agarose gels and visualized by ethidium bromide staining. B) The Gibbs free energy coefficient for 5' UTR sequences of the indicated host and viral mRNAs was calculated using the default settings of the mFOLD algorithm (<http://mfold.rna.albany.edu>).

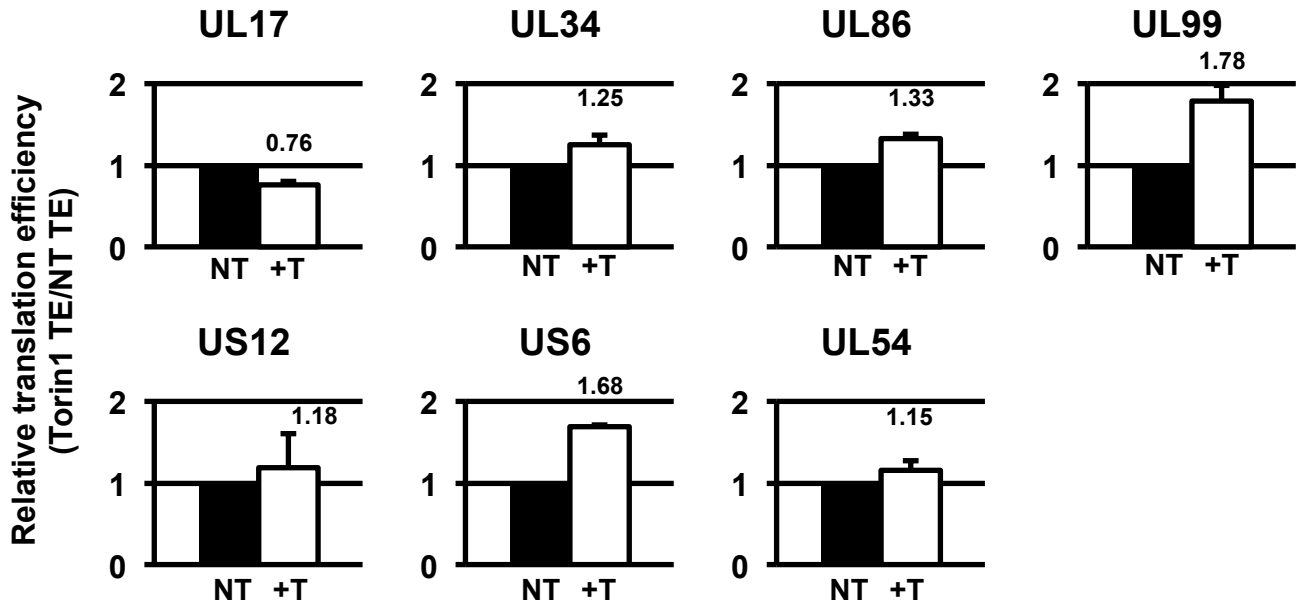

**Figure S3. qRT-PCR confirmation of changes in translation efficiency for HCMV mRNAs in the presence of Torin1.** The abundance of viral mRNAs in polysome and monosome containing fractions of the gradient was determined by qRT-PCR. The polysome to monosome ratio represents the translation efficiency of the mRNA, which was set to 1 in untreated samples (NT= untreated cells, +T = Torin1 treated). The data represent the mean of two experiments (n =2) which were separate from those used in the microarray analysis.

Table S1. Host mRNAs inhibited by Torin1

| Feature# | Gene                | NT TE | NT TE<br>STDEV | Torin1<br>TE | Torin1<br>STDEV | Ratio TE<br>Torin1/<br>NT | log2 Fold<br>Change | P-value |
|----------|---------------------|-------|----------------|--------------|-----------------|---------------------------|---------------------|---------|
| 16267    | ANKRD42             | 1.075 | 0.174          | 0.273        | 0.084           | 0.254                     | -1.975              | 0.002   |
| 28054    | A_33_P3277323       | 0.639 | 0.167          | 0.163        | 0.039           | 0.255                     | -1.969              | 0.009   |
| 33731    | RPS6                | 0.764 | 0.140          | 0.198        | 0.017           | 0.259                     | -1.950              | 0.002   |
| 8924     | RPS6                | 0.762 | 0.145          | 0.198        | 0.018           | 0.260                     | -1.943              | 0.003   |
| 11195    | A_33_P3233030       | 0.911 | 0.134          | 0.239        | 0.068           | 0.263                     | -1.929              | 0.001   |
| 25286    | RPS6                | 0.772 | 0.156          | 0.204        | 0.024           | 0.265                     | -1.917              | 0.003   |
| 9558     | RPS6                | 0.744 | 0.135          | 0.197        | 0.017           | 0.265                     | -1.916              | 0.002   |
| 36871    | RPS6                | 0.766 | 0.116          | 0.205        | 0.032           | 0.267                     | -1.903              | 0.001   |
| 5283     | RPS6                | 0.734 | 0.136          | 0.196        | 0.014           | 0.268                     | -1.901              | 0.002   |
| 27256    | RPS6                | 0.766 | 0.151          | 0.209        | 0.030           | 0.272                     | -1.878              | 0.003   |
| 24200    | RPL32               | 0.969 | 0.267          | 0.267        | 0.081           | 0.275                     | -1.863              | 0.012   |
| 43039    | RPS6                | 0.729 | 0.132          | 0.201        | 0.028           | 0.276                     | -1.860              | 0.002   |
| 12713    | RPS3A               | 0.633 | 0.076          | 0.178        | 0.015           | 0.281                     | -1.830              | 0.001   |
| 3738     | A_33_P3359984       | 0.724 | 0.163          | 0.205        | 0.076           | 0.283                     | -1.820              | 0.007   |
| 27984    | RPS3A               | 0.636 | 0.077          | 0.181        | 0.017           | 0.284                     | -1.817              | 0.001   |
| 31818    | A_24_P76358         | 0.668 | 0.143          | 0.191        | 0.055           | 0.286                     | -1.807              | 0.006   |
| 19950    | A_24_P24724         | 1.249 | 0.164          | 0.358        | 0.117           | 0.286                     | -1.804              | 0.002   |
| 14371    | A_33_P3390873       | 0.838 | 0.168          | 0.242        | 0.024           | 0.289                     | -1.792              | 0.004   |
| 18438    | RPL21               | 0.694 | 0.107          | 0.202        | 0.025           | 0.291                     | -1.781              | 0.001   |
| 16001    | RPL12               | 0.512 | 0.128          | 0.150        | 0.021           | 0.293                     | -1.772              | 0.009   |
| 23448    | RPL21               | 0.681 | 0.072          | 0.200        | 0.023           | 0.294                     | -1.768              | 0.000   |
| 19812    | RPL21               | 0.726 | 0.064          | 0.215        | 0.027           | 0.295                     | -1.759              | 0.000   |
| 37847    | RPS3A               | 0.578 | 0.060          | 0.171        | 0.030           | 0.296                     | -1.754              | 0.000   |
| 27273    | A_24_P349387        | 0.461 | 0.098          | 0.137        | 0.021           | 0.298                     | -1.748              | 0.005   |
| 26811    | RPL32P3             | 0.781 | 0.093          | 0.233        | 0.053           | 0.299                     | -1.743              | 0.001   |
| 37374    | RPL26               | 0.523 | 0.043          | 0.157        | 0.037           | 0.301                     | -1.733              | 0.000   |
| 2205     | RPL21               | 0.741 | 0.060          | 0.226        | 0.051           | 0.305                     | -1.714              | 0.000   |
| 22104    | RPS3A               | 0.592 | 0.064          | 0.181        | 0.027           | 0.305                     | -1.713              | 0.000   |
| 33232    | A_33_P3409553       | 0.513 | 0.093          | 0.158        | 0.032           | 0.307                     | -1.704              | 0.003   |
| 4271     | RPL7                | 0.622 | 0.133          | 0.191        | 0.032           | 0.308                     | -1.700              | 0.005   |
| 20889    | RPL21               | 0.581 | 0.089          | 0.179        | 0.039           | 0.308                     | -1.698              | 0.002   |
| 32482    | RPL7                | 0.856 | 0.208          | 0.264        | 0.044           | 0.309                     | -1.696              | 0.008   |
| 5942     | A_32_P113154        | 0.717 | 0.150          | 0.223        | 0.031           | 0.311                     | -1.687              | 0.005   |
| 16994    | ENST0000039898<br>1 | 0.607 | 0.092          | 0.190        | 0.058           | 0.313                     | -1.676              | 0.003   |
| 24861    | ENST0000042743<br>8 | 0.521 | 0.109          | 0.163        | 0.027           | 0.313                     | -1.676              | 0.005   |
| 1683     | RPS3A               | 0.588 | 0.070          | 0.184        | 0.044           | 0.313                     | -1.674              | 0.001   |
| 40284    | RPL26               | 0.518 | 0.119          | 0.163        | 0.028           | 0.315                     | -1.667              | 0.007   |
| 20234    | RPL21P44            | 0.685 | 0.064          | 0.216        | 0.035           | 0.315                     | -1.667              | 0.000   |
| 20154    | LOC648771           | 0.464 | 0.088          | 0.146        | 0.025           | 0.315                     | -1.666              | 0.004   |
| 21188    | RPL21               | 0.648 | 0.053          | 0.204        | 0.026           | 0.315                     | -1.665              | 0.000   |
| 35428    | A_24_P118591        | 0.734 | 0.029          | 0.232        | 0.041           | 0.316                     | -1.662              | 0.000   |
| 37661    | RPL21               | 0.721 | 0.101          | 0.228        | 0.024           | 0.316                     | -1.660              | 0.001   |
| 19572    | A_24_P349636        | 0.651 | 0.132          | 0.206        | 0.034           | 0.317                     | -1.658              | 0.005   |
| 43734    | RPL21               | 0.649 | 0.122          | 0.207        | 0.038           | 0.318                     | -1.652              | 0.004   |
| 19281    | A_24_P366165        | 0.469 | 0.143          | 0.150        | 0.026           | 0.320                     | -1.646              | 0.019   |
| 27752    | RPS7                | 0.795 | 0.099          | 0.256        | 0.046           | 0.322                     | -1.634              | 0.001   |
| 39978    | RPS15A              | 0.645 | 0.047          | 0.209        | 0.058           | 0.324                     | -1.625              | 0.001   |
| 1587     | ENST0000042743<br>8 | 0.518 | 0.101          | 0.168        | 0.023           | 0.325                     | -1.620              | 0.004   |

Table S1. Host mRNAs inhibited by Torin1

|       |                     |       |       |       |       |       |        |       |
|-------|---------------------|-------|-------|-------|-------|-------|--------|-------|
| 9959  | A_24_P24790         | 0.679 | 0.068 | 0.222 | 0.033 | 0.326 | -1.616 | 0.000 |
| 4864  | BE300169            | 0.792 | 0.054 | 0.260 | 0.044 | 0.328 | -1.606 | 0.000 |
| 17464 | RPL6                | 0.872 | 0.139 | 0.287 | 0.065 | 0.329 | -1.605 | 0.003 |
| 8655  | RPL10A              | 0.874 | 0.096 | 0.288 | 0.025 | 0.330 | -1.600 | 0.001 |
| 24651 | RPL34               | 0.818 | 0.072 | 0.270 | 0.028 | 0.330 | -1.598 | 0.000 |
| 36671 | RPL7                | 0.581 | 0.168 | 0.194 | 0.040 | 0.334 | -1.583 | 0.018 |
| 20492 | RPL34               | 0.849 | 0.097 | 0.284 | 0.031 | 0.334 | -1.581 | 0.001 |
| 24661 | ENST0000044743<br>2 | 0.797 | 0.079 | 0.269 | 0.051 | 0.338 | -1.566 | 0.001 |
| 35148 | A_24_P84808         | 0.632 | 0.169 | 0.214 | 0.042 | 0.338 | -1.565 | 0.014 |
| 42136 | A_24_P332471        | 0.540 | 0.167 | 0.183 | 0.033 | 0.339 | -1.562 | 0.022 |
| 105   | A_24_P316074        | 0.633 | 0.176 | 0.215 | 0.048 | 0.339 | -1.560 | 0.016 |
| 21076 | RPS15A              | 0.564 | 0.069 | 0.192 | 0.049 | 0.340 | -1.557 | 0.002 |
| 10934 | RPS7                | 0.773 | 0.068 | 0.263 | 0.048 | 0.340 | -1.556 | 0.000 |
| 44934 | LOC643563           | 0.937 | 0.172 | 0.319 | 0.068 | 0.340 | -1.556 | 0.004 |
| 4682  | EEF1A1              | 0.863 | 0.162 | 0.295 | 0.090 | 0.342 | -1.549 | 0.006 |
| 35976 | CR593048            | 0.506 | 0.113 | 0.174 | 0.036 | 0.343 | -1.542 | 0.008 |
| 3620  | RPS13               | 0.642 | 0.097 | 0.221 | 0.019 | 0.344 | -1.539 | 0.002 |
| 39281 | RPS24               | 0.703 | 0.078 | 0.242 | 0.034 | 0.344 | -1.538 | 0.001 |
| 26021 | RPLP2               | 0.702 | 0.124 | 0.242 | 0.022 | 0.345 | -1.536 | 0.003 |
| 39893 | RPL7A               | 0.875 | 0.090 | 0.302 | 0.027 | 0.345 | -1.536 | 0.000 |
| 4702  | RPL14               | 1.081 | 0.114 | 0.373 | 0.052 | 0.345 | -1.534 | 0.001 |
| 17049 | RPS7P5              | 0.791 | 0.107 | 0.276 | 0.075 | 0.349 | -1.520 | 0.002 |
| 16217 | EEF1A1              | 0.946 | 0.173 | 0.331 | 0.083 | 0.350 | -1.515 | 0.005 |
| 43952 | A_24_P272548        | 0.870 | 0.132 | 0.304 | 0.080 | 0.350 | -1.514 | 0.003 |
| 16585 | A_32_P125549        | 0.542 | 0.043 | 0.191 | 0.026 | 0.353 | -1.503 | 0.000 |
| 7383  | RPS20               | 0.475 | 0.083 | 0.167 | 0.032 | 0.353 | -1.503 | 0.004 |
| 11866 | RPL10A              | 0.902 | 0.141 | 0.319 | 0.022 | 0.353 | -1.501 | 0.002 |
| 39896 | ENST0000045225<br>3 | 0.595 | 0.053 | 0.211 | 0.065 | 0.355 | -1.496 | 0.001 |
| 10476 | A_33_P3317431       | 0.584 | 0.160 | 0.207 | 0.051 | 0.355 | -1.496 | 0.018 |
| 29254 | RPL21               | 0.588 | 0.042 | 0.209 | 0.049 | 0.355 | -1.492 | 0.001 |
| 2289  | TPT1                | 0.338 | 0.053 | 0.120 | 0.015 | 0.356 | -1.491 | 0.002 |
| 2004  | RPS15A              | 0.560 | 0.066 | 0.199 | 0.062 | 0.356 | -1.490 | 0.002 |
| 11391 | RPS19               | 0.420 | 0.070 | 0.150 | 0.011 | 0.357 | -1.485 | 0.003 |
| 43661 | A_33_P3384997       | 0.498 | 0.108 | 0.178 | 0.041 | 0.358 | -1.483 | 0.009 |
| 8213  | RPL24               | 1.164 | 0.102 | 0.417 | 0.049 | 0.358 | -1.483 | 0.000 |
| 35974 | RPL35A              | 0.892 | 0.211 | 0.321 | 0.067 | 0.360 | -1.475 | 0.011 |
| 37526 | RPS15A              | 0.581 | 0.040 | 0.209 | 0.074 | 0.360 | -1.474 | 0.002 |
| 12835 | AF147412            | 0.589 | 0.025 | 0.212 | 0.067 | 0.360 | -1.472 | 0.001 |
| 10165 | RPS23               | 0.562 | 0.038 | 0.203 | 0.025 | 0.361 | -1.468 | 0.000 |
| 31195 | RPL5                | 0.865 | 0.164 | 0.313 | 0.060 | 0.362 | -1.466 | 0.005 |
| 25658 | A_24_P42014         | 0.845 | 0.064 | 0.306 | 0.036 | 0.362 | -1.465 | 0.000 |
| 32011 | RPL31               | 0.575 | 0.112 | 0.208 | 0.029 | 0.362 | -1.465 | 0.005 |
| 21993 | RPS8                | 0.871 | 0.146 | 0.316 | 0.043 | 0.363 | -1.462 | 0.003 |
| 9326  | EEF1A1              | 0.699 | 0.242 | 0.255 | 0.051 | 0.364 | -1.457 | 0.036 |
| 4899  | RPL5                | 0.873 | 0.117 | 0.318 | 0.047 | 0.365 | -1.456 | 0.002 |
| 41344 | RPL13AP3            | 0.735 | 0.162 | 0.270 | 0.033 | 0.367 | -1.447 | 0.008 |
| 44061 | A_24_P606663        | 0.656 | 0.102 | 0.241 | 0.081 | 0.367 | -1.445 | 0.005 |
| 45026 | RPL23               | 0.811 | 0.179 | 0.299 | 0.019 | 0.368 | -1.441 | 0.008 |
| 7552  | RPL31               | 0.555 | 0.106 | 0.205 | 0.029 | 0.369 | -1.440 | 0.005 |
| 3084  | A_24_P375683        | 0.876 | 0.129 | 0.324 | 0.047 | 0.370 | -1.434 | 0.002 |
| 7980  | RPL13A              | 0.766 | 0.150 | 0.285 | 0.018 | 0.372 | -1.426 | 0.005 |
| 18495 | RPL19               | 0.992 | 0.157 | 0.370 | 0.064 | 0.373 | -1.423 | 0.003 |

Table S1. Host mRNAs inhibited by Torin1

|       |               |       |       |       |       |       |        |       |
|-------|---------------|-------|-------|-------|-------|-------|--------|-------|
| 34884 | RPL24         | 1.102 | 0.085 | 0.412 | 0.081 | 0.374 | -1.420 | 0.001 |
| 18982 | TPT1          | 0.359 | 0.041 | 0.134 | 0.024 | 0.374 | -1.418 | 0.001 |
| 3829  | CR590938      | 1.115 | 0.213 | 0.419 | 0.093 | 0.375 | -1.413 | 0.007 |
| 13815 | A_33_P3263277 | 0.988 | 0.208 | 0.374 | 0.056 | 0.379 | -1.401 | 0.008 |
| 38558 | RPL13A        | 0.700 | 0.075 | 0.266 | 0.040 | 0.380 | -1.397 | 0.001 |
| 44324 | A_24_P152983  | 0.798 | 0.237 | 0.304 | 0.040 | 0.381 | -1.394 | 0.023 |
| 30655 | RPS10         | 0.916 | 0.211 | 0.349 | 0.057 | 0.381 | -1.393 | 0.011 |
| 39849 | RPS18         | 0.471 | 0.065 | 0.179 | 0.046 | 0.381 | -1.393 | 0.003 |
| 43675 | A_33_P3362812 | 0.611 | 0.049 | 0.233 | 0.077 | 0.381 | -1.392 | 0.002 |
| 9449  | RPL28         | 0.687 | 0.102 | 0.263 | 0.007 | 0.383 | -1.385 | 0.002 |
| 37543 | RPS17         | 0.771 | 0.076 | 0.296 | 0.033 | 0.384 | -1.382 | 0.001 |
| 18998 | RPL17         | 0.698 | 0.231 | 0.270 | 0.055 | 0.387 | -1.370 | 0.036 |
| 31275 | RPS18         | 0.489 | 0.077 | 0.189 | 0.016 | 0.387 | -1.369 | 0.003 |
| 29722 | RPS19         | 0.443 | 0.067 | 0.171 | 0.011 | 0.387 | -1.368 | 0.002 |
| 24902 | RPL9          | 0.671 | 0.106 | 0.260 | 0.048 | 0.388 | -1.367 | 0.004 |
| 17347 | RPS14         | 0.514 | 0.041 | 0.200 | 0.019 | 0.388 | -1.364 | 0.000 |
| 3232  | A_24_P315184  | 0.510 | 0.139 | 0.199 | 0.027 | 0.389 | -1.362 | 0.019 |
| 31082 | A_32_P18493   | 1.203 | 0.060 | 0.469 | 0.071 | 0.390 | -1.358 | 0.000 |
| 20022 | A_24_P350008  | 0.745 | 0.099 | 0.291 | 0.029 | 0.391 | -1.354 | 0.002 |
| 3709  | RPL13A        | 0.725 | 0.104 | 0.284 | 0.024 | 0.392 | -1.349 | 0.002 |
| 22071 | A_24_P135501  | 0.727 | 0.034 | 0.285 | 0.044 | 0.392 | -1.349 | 0.000 |
| 7195  | RPS10         | 0.779 | 0.006 | 0.306 | 0.096 | 0.393 | -1.349 | 0.001 |
| 29508 | A_24_P194962  | 0.792 | 0.024 | 0.314 | 0.060 | 0.396 | -1.335 | 0.000 |
| 32740 | A_24_P50554   | 0.660 | 0.165 | 0.262 | 0.055 | 0.398 | -1.330 | 0.017 |
| 23016 | C20orf141     | 1.528 | 0.198 | 0.609 | 0.180 | 0.398 | -1.328 | 0.004 |
| 13727 | A_24_P383330  | 0.653 | 0.028 | 0.261 | 0.056 | 0.400 | -1.324 | 0.000 |
| 3972  | A_24_P161355  | 0.789 | 0.022 | 0.316 | 0.078 | 0.400 | -1.321 | 0.001 |
| 29257 | A_33_P3297277 | 0.801 | 0.086 | 0.322 | 0.065 | 0.402 | -1.315 | 0.002 |
| 32808 | RPL39         | 0.262 | 0.052 | 0.106 | 0.011 | 0.402 | -1.313 | 0.007 |
| 6636  | A_33_P3389540 | 0.995 | 0.110 | 0.401 | 0.076 | 0.403 | -1.312 | 0.002 |
| 4726  | A_33_P3234377 | 1.340 | 0.164 | 0.540 | 0.123 | 0.403 | -1.310 | 0.003 |
| 23200 | A_33_P3255782 | 0.696 | 0.040 | 0.281 | 0.091 | 0.403 | -1.309 | 0.002 |
| 34178 | A_23_P258108  | 0.739 | 0.065 | 0.298 | 0.055 | 0.404 | -1.309 | 0.001 |
| 10649 | A_33_P3270966 | 1.418 | 0.296 | 0.573 | 0.107 | 0.404 | -1.307 | 0.010 |
| 30225 | EEF1B2        | 0.661 | 0.078 | 0.267 | 0.029 | 0.404 | -1.306 | 0.001 |
| 7304  | RPS10P7       | 0.937 | 0.224 | 0.380 | 0.091 | 0.405 | -1.303 | 0.016 |
| 2746  | A_33_P3257944 | 0.684 | 0.079 | 0.277 | 0.054 | 0.406 | -1.302 | 0.002 |
| 25778 | RPL6          | 1.001 | 0.132 | 0.408 | 0.081 | 0.407 | -1.297 | 0.003 |
| 13315 | A_24_P58881   | 0.777 | 0.137 | 0.317 | 0.039 | 0.407 | -1.295 | 0.005 |
| 25214 | RPL5          | 0.722 | 0.084 | 0.296 | 0.072 | 0.410 | -1.288 | 0.003 |
| 17713 | A_24_P178654  | 0.732 | 0.091 | 0.300 | 0.076 | 0.410 | -1.286 | 0.003 |
| 6400  | EEF1A1        | 0.518 | 0.173 | 0.213 | 0.052 | 0.410 | -1.286 | 0.043 |
| 21410 | A_24_P375599  | 0.724 | 0.093 | 0.298 | 0.054 | 0.411 | -1.282 | 0.002 |
| 39004 | A_33_P3375668 | 0.886 | 0.170 | 0.366 | 0.060 | 0.413 | -1.277 | 0.007 |
| 27991 | RPS10         | 0.678 | 0.020 | 0.280 | 0.082 | 0.413 | -1.276 | 0.001 |
| 2546  | TUBB2B        | 1.662 | 0.189 | 0.689 | 0.057 | 0.415 | -1.270 | 0.001 |
| 17559 | A_33_P3353259 | 0.950 | 0.082 | 0.394 | 0.096 | 0.415 | -1.270 | 0.002 |
| 41738 | EEF1A1        | 0.503 | 0.154 | 0.209 | 0.063 | 0.415 | -1.269 | 0.038 |
| 8836  | RPL23         | 0.820 | 0.054 | 0.341 | 0.028 | 0.415 | -1.267 | 0.000 |
| 10568 | RPS10         | 0.715 | 0.028 | 0.299 | 0.082 | 0.418 | -1.258 | 0.001 |
| 22705 | RPL17         | 0.595 | 0.047 | 0.249 | 0.049 | 0.418 | -1.257 | 0.001 |
| 36473 | RPL10         | 1.014 | 0.105 | 0.427 | 0.052 | 0.421 | -1.248 | 0.001 |
| 44423 | RPL27         | 0.714 | 0.103 | 0.302 | 0.068 | 0.422 | -1.243 | 0.004 |

Table S1. Host mRNAs inhibited by Torin1

|       |                     |       |       |       |       |       |        |       |
|-------|---------------------|-------|-------|-------|-------|-------|--------|-------|
| 36847 | ENST0000035965<br>9 | 0.701 | 0.011 | 0.296 | 0.066 | 0.423 | -1.242 | 0.000 |
| 5898  | RPS11               | 0.565 | 0.046 | 0.240 | 0.014 | 0.425 | -1.235 | 0.000 |
| 23883 | A_24_P315921        | 1.246 | 0.049 | 0.531 | 0.211 | 0.426 | -1.232 | 0.005 |
| 2451  | RPL13               | 0.617 | 0.094 | 0.263 | 0.038 | 0.427 | -1.229 | 0.004 |
| 22380 | RPL19P12            | 0.828 | 0.064 | 0.355 | 0.078 | 0.429 | -1.221 | 0.001 |
| 6801  | A_24_P126691        | 0.630 | 0.125 | 0.271 | 0.056 | 0.430 | -1.218 | 0.011 |
| 4129  | ENST0000030100<br>8 | 1.309 | 0.195 | 0.563 | 0.123 | 0.430 | -1.218 | 0.005 |
| 17378 | RPL10               | 0.807 | 0.019 | 0.347 | 0.111 | 0.430 | -1.217 | 0.002 |
| 19104 | A_24_P246692        | 0.911 | 0.115 | 0.392 | 0.057 | 0.430 | -1.216 | 0.002 |
| 17014 | A_24_P186944        | 0.620 | 0.032 | 0.267 | 0.070 | 0.430 | -1.216 | 0.001 |
| 22846 | A_24_P547010        | 0.853 | 0.135 | 0.367 | 0.054 | 0.431 | -1.216 | 0.004 |
| 1075  | RPL23P8             | 0.879 | 0.106 | 0.380 | 0.054 | 0.432 | -1.210 | 0.002 |
| 29664 | RPL22               | 0.901 | 0.096 | 0.390 | 0.089 | 0.433 | -1.209 | 0.002 |
| 30698 | RPL37               | 0.421 | 0.052 | 0.183 | 0.033 | 0.434 | -1.206 | 0.003 |
| 16408 | RPS27A              | 0.803 | 0.115 | 0.348 | 0.053 | 0.434 | -1.205 | 0.003 |
| 661   | A_33_P3246995       | 0.599 | 0.094 | 0.260 | 0.068 | 0.434 | -1.203 | 0.007 |
| 38552 | A_33_P3351529       | 0.652 | 0.071 | 0.284 | 0.034 | 0.436 | -1.196 | 0.001 |
| 6600  | EEF1D               | 1.054 | 0.237 | 0.462 | 0.019 | 0.438 | -1.191 | 0.012 |
| 7422  | RPL10               | 0.790 | 0.028 | 0.347 | 0.089 | 0.439 | -1.189 | 0.001 |
| 12521 | LOC644961           | 1.376 | 0.086 | 0.606 | 0.085 | 0.440 | -1.183 | 0.000 |
| 12514 | EIF3H               | 0.836 | 0.105 | 0.369 | 0.096 | 0.441 | -1.182 | 0.005 |
| 26043 | RPL10L              | 0.833 | 0.013 | 0.368 | 0.127 | 0.442 | -1.179 | 0.003 |
| 34183 | A_33_P3210702       | 0.882 | 0.095 | 0.390 | 0.095 | 0.442 | -1.178 | 0.003 |
| 9095  | ACTG1               | 1.090 | 0.108 | 0.482 | 0.059 | 0.442 | -1.178 | 0.001 |
| 10879 | A_33_P3315027       | 0.418 | 0.113 | 0.185 | 0.024 | 0.443 | -1.175 | 0.025 |
| 5198  | A_24_P878388        | 0.828 | 0.111 | 0.367 | 0.069 | 0.444 | -1.173 | 0.004 |
| 39585 | SLC25A5             | 1.094 | 0.025 | 0.485 | 0.105 | 0.444 | -1.173 | 0.001 |
| 39389 | RPL36A              | 0.652 | 0.065 | 0.289 | 0.023 | 0.444 | -1.171 | 0.001 |
| 4286  | A_24_P33552         | 0.431 | 0.107 | 0.192 | 0.040 | 0.446 | -1.165 | 0.022 |
| 25216 | RPL3                | 0.837 | 0.111 | 0.374 | 0.036 | 0.447 | -1.163 | 0.002 |
| 6752  | RPS4X               | 1.054 | 0.058 | 0.472 | 0.022 | 0.448 | -1.160 | 0.000 |
| 10713 | A_33_P3309684       | 0.740 | 0.145 | 0.333 | 0.086 | 0.449 | -1.154 | 0.014 |
| 7331  | RPS5                | 0.768 | 0.167 | 0.345 | 0.048 | 0.450 | -1.154 | 0.014 |
| 11407 | EEF1DP3             | 0.899 | 0.258 | 0.406 | 0.072 | 0.452 | -1.145 | 0.034 |
| 14880 | RPL23A              | 0.414 | 0.127 | 0.187 | 0.026 | 0.453 | -1.143 | 0.039 |
| 3443  | RPL17               | 0.712 | 0.128 | 0.322 | 0.067 | 0.453 | -1.143 | 0.010 |
| 19249 | RPL23A              | 0.405 | 0.127 | 0.183 | 0.025 | 0.453 | -1.142 | 0.041 |
| 38156 | A_33_P3354479       | 0.423 | 0.110 | 0.192 | 0.038 | 0.454 | -1.141 | 0.026 |
| 33151 | RPL22L1             | 0.535 | 0.059 | 0.243 | 0.051 | 0.455 | -1.137 | 0.003 |
| 9090  | A_24_P203726        | 0.808 | 0.056 | 0.368 | 0.020 | 0.456 | -1.133 | 0.000 |
| 29633 | RPL39               | 0.253 | 0.057 | 0.116 | 0.015 | 0.459 | -1.124 | 0.016 |
| 39706 | A_33_P3412125       | 0.706 | 0.102 | 0.325 | 0.023 | 0.460 | -1.120 | 0.003 |
| 38732 | UBA52               | 0.975 | 0.149 | 0.449 | 0.079 | 0.461 | -1.117 | 0.006 |
| 4840  | AK124741            | 0.239 | 0.036 | 0.110 | 0.020 | 0.462 | -1.116 | 0.006 |
| 410   | A_33_P3279456       | 0.297 | 0.051 | 0.137 | 0.018 | 0.462 | -1.113 | 0.007 |
| 34109 | A_24_P84048         | 0.744 | 0.146 | 0.345 | 0.119 | 0.463 | -1.110 | 0.021 |
| 10608 | A_24_P144163        | 1.138 | 0.138 | 0.528 | 0.129 | 0.464 | -1.109 | 0.005 |
| 28394 | GNB2L1              | 0.785 | 0.065 | 0.365 | 0.094 | 0.465 | -1.104 | 0.003 |
| 3037  | RPS9                | 0.949 | 0.084 | 0.443 | 0.066 | 0.466 | -1.100 | 0.001 |
| 17641 | RPS16               | 0.750 | 0.100 | 0.350 | 0.040 | 0.467 | -1.100 | 0.003 |
| 17944 | RPS4P16             | 1.142 | 0.090 | 0.534 | 0.075 | 0.467 | -1.098 | 0.001 |
| 7230  | A_33_P3376071       | 0.421 | 0.109 | 0.197 | 0.031 | 0.468 | -1.096 | 0.027 |

Table S1. Host mRNAs inhibited by Torin1

|       |                     |       |       |       |       |       |        |       |
|-------|---------------------|-------|-------|-------|-------|-------|--------|-------|
| 39258 | RPS14               | 0.591 | 0.078 | 0.278 | 0.077 | 0.470 | -1.089 | 0.008 |
| 2813  | A_24_P187023        | 0.888 | 0.052 | 0.419 | 0.097 | 0.472 | -1.084 | 0.002 |
| 17352 | RPL35               | 0.798 | 0.078 | 0.377 | 0.036 | 0.472 | -1.083 | 0.001 |
| 185   | RPL15               | 0.770 | 0.111 | 0.364 | 0.075 | 0.473 | -1.080 | 0.006 |
| 24406 | RPL18A              | 0.663 | 0.036 | 0.314 | 0.014 | 0.474 | -1.078 | 0.000 |
| 7375  | RPL23A              | 0.412 | 0.101 | 0.196 | 0.042 | 0.474 | -1.077 | 0.027 |
| 27179 | A_24_P50157         | 0.245 | 0.026 | 0.116 | 0.013 | 0.474 | -1.076 | 0.002 |
| 21861 | RPS3                | 0.640 | 0.085 | 0.304 | 0.103 | 0.475 | -1.075 | 0.012 |
| 25329 | RGS10               | 0.969 | 0.135 | 0.462 | 0.127 | 0.477 | -1.068 | 0.009 |
| 24993 | ENST0000033459<br>1 | 1.114 | 0.078 | 0.531 | 0.095 | 0.477 | -1.068 | 0.001 |
| 10399 | A_24_P306964        | 0.587 | 0.109 | 0.281 | 0.078 | 0.478 | -1.063 | 0.017 |
| 12115 | RPL3                | 0.800 | 0.037 | 0.383 | 0.028 | 0.479 | -1.061 | 0.000 |
| 20081 | RPLP0               | 0.451 | 0.061 | 0.217 | 0.012 | 0.480 | -1.059 | 0.003 |
| 18065 | ENST0000042765<br>1 | 0.851 | 0.086 | 0.409 | 0.086 | 0.480 | -1.058 | 0.003 |
| 3018  | A_24_P401100        | 0.848 | 0.146 | 0.408 | 0.073 | 0.481 | -1.055 | 0.009 |
| 2116  | RPS28               | 0.492 | 0.072 | 0.238 | 0.031 | 0.483 | -1.050 | 0.005 |
| 34504 | HNRNPA1L2           | 1.535 | 0.190 | 0.744 | 0.026 | 0.484 | -1.045 | 0.002 |
| 33566 | RPS4Y1              | 1.142 | 0.088 | 0.557 | 0.198 | 0.488 | -1.036 | 0.009 |
| 36703 | RPS9                | 1.121 | 0.110 | 0.547 | 0.066 | 0.488 | -1.036 | 0.002 |
| 30600 | YBX1                | 1.114 | 0.108 | 0.544 | 0.054 | 0.488 | -1.035 | 0.001 |
| 40828 | NP1207855           | 0.479 | 0.046 | 0.235 | 0.016 | 0.490 | -1.029 | 0.001 |
| 22684 | BTF3L1              | 1.090 | 0.219 | 0.535 | 0.126 | 0.491 | -1.027 | 0.019 |
| 20498 | RPL8                | 1.218 | 0.187 | 0.598 | 0.133 | 0.491 | -1.026 | 0.009 |
| 2462  | BTF3L1              | 1.070 | 0.193 | 0.526 | 0.127 | 0.491 | -1.026 | 0.015 |
| 27612 | BTF3L1              | 1.068 | 0.225 | 0.525 | 0.119 | 0.492 | -1.023 | 0.021 |
| 267   | RP3-377H14.5        | 0.451 | 0.069 | 0.222 | 0.066 | 0.492 | -1.023 | 0.014 |
| 35493 | BTF3L1              | 1.089 | 0.237 | 0.537 | 0.134 | 0.493 | -1.020 | 0.025 |
| 14835 | RPS25               | 0.504 | 0.136 | 0.249 | 0.053 | 0.493 | -1.020 | 0.039 |
| 28647 | A_24_P417606        | 0.920 | 0.062 | 0.454 | 0.077 | 0.493 | -1.020 | 0.001 |
| 14551 | KIAA0101            | 0.767 | 0.158 | 0.378 | 0.115 | 0.493 | -1.020 | 0.026 |
| 3057  | RPL11               | 0.790 | 0.117 | 0.390 | 0.015 | 0.494 | -1.018 | 0.004 |
| 27320 | RPL13               | 0.900 | 0.132 | 0.446 | 0.026 | 0.495 | -1.014 | 0.004 |
| 7166  | ENST0000039433<br>3 | 0.848 | 0.084 | 0.421 | 0.095 | 0.496 | -1.013 | 0.004 |
| 11921 | NSA2                | 1.576 | 0.232 | 0.782 | 0.118 | 0.496 | -1.011 | 0.006 |
| 36424 | BTF3L1              | 1.075 | 0.204 | 0.534 | 0.145 | 0.496 | -1.010 | 0.020 |
| 10254 | RPL35               | 0.827 | 0.022 | 0.411 | 0.060 | 0.497 | -1.010 | 0.000 |
| 5805  | KIAA0101            | 0.761 | 0.127 | 0.378 | 0.114 | 0.497 | -1.008 | 0.018 |
| 19599 | AI418341            | 0.219 | 0.021 | 0.109 | 0.020 | 0.499 | -1.004 | 0.003 |
| 14490 | A_33_P3345501       | 1.210 | 0.280 | 0.605 | 0.167 | 0.500 | -1.001 | 0.032 |
| 1511  | KIAA0101            | 0.784 | 0.156 | 0.393 | 0.117 | 0.501 | -0.997 | 0.026 |
| 9676  | BTF3L1              | 1.065 | 0.198 | 0.534 | 0.142 | 0.501 | -0.996 | 0.019 |
| 38154 | RPLP0               | 0.442 | 0.044 | 0.221 | 0.025 | 0.501 | -0.996 | 0.002 |
| 7515  | A_24_P256037        | 0.838 | 0.021 | 0.420 | 0.076 | 0.502 | -0.994 | 0.001 |
| 4412  | A_33_P3231242       | 1.130 | 0.188 | 0.568 | 0.167 | 0.502 | -0.993 | 0.018 |
| 21910 | SLC25A6             | 1.023 | 0.140 | 0.514 | 0.020 | 0.503 | -0.992 | 0.003 |
| 33954 | RPLP0P3             | 0.492 | 0.092 | 0.248 | 0.041 | 0.503 | -0.992 | 0.014 |
| 30116 | HNRNPA1             | 1.217 | 0.168 | 0.612 | 0.154 | 0.503 | -0.992 | 0.010 |
| 36961 | RPLP0               | 0.445 | 0.045 | 0.224 | 0.026 | 0.503 | -0.990 | 0.002 |
| 36196 | RPLP0               | 0.443 | 0.044 | 0.223 | 0.026 | 0.503 | -0.990 | 0.002 |
| 4591  | ENST0000041148<br>8 | 0.226 | 0.023 | 0.114 | 0.016 | 0.504 | -0.990 | 0.002 |



Table S1. Host mRNAs inhibited by Torin1

|       |               |       |       |       |       |       |        |       |
|-------|---------------|-------|-------|-------|-------|-------|--------|-------|
| 5157  | A_33_P3329991 | 0.691 | 0.133 | 0.349 | 0.049 | 0.505 | -0.986 | 0.014 |
| 25681 | TUBB3         | 1.542 | 0.107 | 0.779 | 0.019 | 0.505 | -0.985 | 0.000 |
| 4227  | RPLP0         | 0.437 | 0.038 | 0.221 | 0.013 | 0.506 | -0.984 | 0.001 |
| 36398 | RPS26         | 0.691 | 0.084 | 0.351 | 0.069 | 0.507 | -0.980 | 0.006 |
| 8912  | RPLP0         | 0.433 | 0.052 | 0.220 | 0.014 | 0.508 | -0.977 | 0.002 |
| 6701  | KIAA0101      | 0.756 | 0.148 | 0.384 | 0.108 | 0.509 | -0.975 | 0.025 |
| 22494 | KIAA0101      | 0.759 | 0.126 | 0.387 | 0.097 | 0.509 | -0.974 | 0.016 |
| 14997 | A_33_P3371769 | 0.300 | 0.076 | 0.153 | 0.024 | 0.510 | -0.972 | 0.033 |
| 38811 | RPL39         | 0.250 | 0.031 | 0.128 | 0.029 | 0.511 | -0.970 | 0.007 |
| 5352  | NAP1L1        | 1.200 | 0.202 | 0.613 | 0.066 | 0.511 | -0.969 | 0.009 |
| 4371  | KIAA0101      | 0.768 | 0.154 | 0.393 | 0.111 | 0.511 | -0.967 | 0.027 |
| 2415  | RPS28         | 0.506 | 0.058 | 0.259 | 0.031 | 0.511 | -0.967 | 0.003 |
| 13251 | BTF3L1        | 1.090 | 0.209 | 0.558 | 0.144 | 0.512 | -0.965 | 0.022 |
| 26646 | POTEF         | 1.233 | 0.127 | 0.634 | 0.162 | 0.514 | -0.960 | 0.007 |
| 30268 | BTF3L1        | 1.041 | 0.172 | 0.536 | 0.144 | 0.515 | -0.958 | 0.017 |
| 2782  | KIAA0101      | 0.739 | 0.124 | 0.382 | 0.107 | 0.517 | -0.953 | 0.020 |
| 32675 | RPS4Y2        | 1.113 | 0.116 | 0.578 | 0.195 | 0.519 | -0.946 | 0.015 |
| 3777  | HNRNPA1L2     | 1.416 | 0.196 | 0.736 | 0.039 | 0.520 | -0.945 | 0.004 |
| 14340 | A_32_P49350   | 0.850 | 0.151 | 0.442 | 0.057 | 0.520 | -0.944 | 0.012 |
| 1902  | RPLP0         | 0.432 | 0.041 | 0.225 | 0.013 | 0.520 | -0.944 | 0.001 |
| 10776 | AHCY          | 0.926 | 0.086 | 0.484 | 0.047 | 0.522 | -0.938 | 0.001 |
| 36241 | YBX1          | 1.437 | 0.104 | 0.752 | 0.070 | 0.523 | -0.935 | 0.001 |
| 15097 | EIF3F         | 0.871 | 0.070 | 0.456 | 0.042 | 0.524 | -0.933 | 0.001 |
| 18073 | PCBP2         | 1.384 | 0.092 | 0.725 | 0.113 | 0.524 | -0.932 | 0.001 |
| 40885 | RPLP0         | 0.435 | 0.054 | 0.228 | 0.011 | 0.524 | -0.932 | 0.003 |
| 40144 | HNRNPA1L2     | 1.495 | 0.219 | 0.785 | 0.022 | 0.525 | -0.929 | 0.005 |
| 27560 | IGBP1         | 1.066 | 0.056 | 0.561 | 0.177 | 0.527 | -0.925 | 0.009 |
| 27066 | A_24_P603890  | 0.900 | 0.083 | 0.475 | 0.066 | 0.527 | -0.924 | 0.002 |
| 40798 | RPLP0         | 0.429 | 0.049 | 0.226 | 0.016 | 0.528 | -0.922 | 0.002 |
| 20239 | KIAA0101      | 0.731 | 0.106 | 0.386 | 0.110 | 0.528 | -0.921 | 0.017 |
| 27822 | EIF1          | 0.821 | 0.088 | 0.435 | 0.196 | 0.530 | -0.917 | 0.036 |
| 30850 | RPS29         | 0.229 | 0.054 | 0.121 | 0.017 | 0.531 | -0.913 | 0.031 |
| 12489 | BTF3          | 1.178 | 0.020 | 0.626 | 0.077 | 0.531 | -0.913 | 0.000 |
| 15480 | A_24_P928604  | 0.683 | 0.010 | 0.364 | 0.012 | 0.532 | -0.909 | 0.000 |
| 149   | RAB13         | 1.307 | 0.069 | 0.696 | 0.182 | 0.533 | -0.909 | 0.006 |
| 3257  | RPL37A        | 0.403 | 0.049 | 0.215 | 0.024 | 0.534 | -0.906 | 0.004 |
| 24424 | IGBP1         | 1.237 | 0.068 | 0.661 | 0.147 | 0.534 | -0.904 | 0.004 |
| 10416 | RPL30         | 0.421 | 0.049 | 0.225 | 0.047 | 0.535 | -0.904 | 0.007 |
| 28372 | RPL30         | 0.428 | 0.073 | 0.230 | 0.043 | 0.536 | -0.899 | 0.015 |
| 8368  | NPM1          | 1.385 | 0.140 | 0.744 | 0.178 | 0.538 | -0.895 | 0.008 |
| 5373  | UQCRB         | 1.076 | 0.091 | 0.579 | 0.112 | 0.538 | -0.895 | 0.004 |
| 35526 | A_33_P3357669 | 0.757 | 0.033 | 0.408 | 0.026 | 0.539 | -0.892 | 0.000 |
| 34947 | RPL30         | 0.441 | 0.088 | 0.238 | 0.045 | 0.539 | -0.891 | 0.024 |
| 20468 | LY96          | 1.110 | 0.107 | 0.599 | 0.230 | 0.539 | -0.891 | 0.025 |
| 4821  | NSA2          | 0.969 | 0.229 | 0.523 | 0.104 | 0.539 | -0.890 | 0.037 |
| 35884 | NME2          | 1.306 | 0.057 | 0.705 | 0.221 | 0.540 | -0.889 | 0.010 |
| 15595 | RPS12         | 0.269 | 0.033 | 0.146 | 0.020 | 0.543 | -0.882 | 0.005 |
| 36363 | RPL30         | 0.445 | 0.061 | 0.242 | 0.050 | 0.543 | -0.881 | 0.011 |
| 3188  | RPL30         | 0.431 | 0.080 | 0.234 | 0.043 | 0.544 | -0.879 | 0.020 |
| 42365 | EEF1G         | 0.754 | 0.111 | 0.410 | 0.072 | 0.544 | -0.878 | 0.011 |
| 20777 | A_24_P135391  | 1.264 | 0.300 | 0.688 | 0.044 | 0.544 | -0.878 | 0.030 |
| 39423 | RPL30         | 0.434 | 0.063 | 0.236 | 0.059 | 0.545 | -0.876 | 0.016 |
| 36912 | LOC646821     | 1.356 | 0.079 | 0.740 | 0.062 | 0.546 | -0.874 | 0.000 |

Table S1. Host mRNAs inhibited by Torin1

|       |                     |       |       |       |       |       |        |       |
|-------|---------------------|-------|-------|-------|-------|-------|--------|-------|
| 34205 | ENST0000027341<br>1 | 0.255 | 0.045 | 0.139 | 0.028 | 0.547 | -0.871 | 0.020 |
| 11619 | IGBP1               | 1.212 | 0.100 | 0.664 | 0.093 | 0.548 | -0.869 | 0.002 |
| 17170 | RPL30               | 0.427 | 0.056 | 0.234 | 0.044 | 0.548 | -0.867 | 0.009 |
| 26594 | TCTN1               | 1.187 | 0.063 | 0.651 | 0.250 | 0.548 | -0.867 | 0.023 |
| 10758 | RPL37A              | 0.409 | 0.051 | 0.224 | 0.017 | 0.549 | -0.866 | 0.004 |
| 27071 | RPL30               | 0.427 | 0.060 | 0.238 | 0.044 | 0.556 | -0.846 | 0.012 |
| 22659 | PCBP2               | 0.933 | 0.101 | 0.521 | 0.122 | 0.558 | -0.841 | 0.011 |
| 29933 | RPSA                | 0.628 | 0.149 | 0.351 | 0.070 | 0.559 | -0.840 | 0.043 |
| 18326 | A_24_P195724        | 1.551 | 0.360 | 0.867 | 0.172 | 0.559 | -0.839 | 0.041 |
| 23942 | ENST0000037056<br>2 | 0.321 | 0.063 | 0.180 | 0.025 | 0.562 | -0.830 | 0.023 |
| 18119 | RPLP1               | 0.249 | 0.060 | 0.140 | 0.005 | 0.563 | -0.829 | 0.035 |
| 29776 | HNRNPA3             | 0.352 | 0.091 | 0.199 | 0.023 | 0.565 | -0.825 | 0.047 |
| 27027 | RPL18               | 0.798 | 0.073 | 0.451 | 0.146 | 0.565 | -0.823 | 0.021 |
| 23024 | A_33_P3241043       | 1.562 | 0.252 | 0.883 | 0.173 | 0.566 | -0.822 | 0.018 |
| 20992 | ZNF525              | 0.298 | 0.060 | 0.169 | 0.030 | 0.566 | -0.822 | 0.029 |
| 40133 | ST13                | 1.283 | 0.140 | 0.727 | 0.110 | 0.566 | -0.820 | 0.006 |
| 5891  | MRPL45              | 0.828 | 0.049 | 0.471 | 0.131 | 0.569 | -0.814 | 0.012 |
| 15142 | A_33_P3771039       | 0.815 | 0.026 | 0.463 | 0.185 | 0.569 | -0.814 | 0.031 |
| 25235 | SLC25A6             | 0.595 | 0.035 | 0.341 | 0.054 | 0.574 | -0.802 | 0.002 |
| 42304 | CCK                 | 1.480 | 0.164 | 0.849 | 0.251 | 0.574 | -0.802 | 0.022 |
| 4212  | PFDN4               | 0.827 | 0.064 | 0.476 | 0.181 | 0.576 | -0.797 | 0.034 |
| 22339 | HNRNPA1L2           | 1.123 | 0.114 | 0.647 | 0.073 | 0.576 | -0.796 | 0.004 |
| 24729 | PABPC1              | 0.482 | 0.029 | 0.278 | 0.070 | 0.576 | -0.795 | 0.010 |
| 34470 | ENST0000031719<br>7 | 0.428 | 0.052 | 0.248 | 0.012 | 0.580 | -0.786 | 0.004 |
| 18258 | PRDX6               | 1.788 | 0.106 | 1.039 | 0.219 | 0.581 | -0.783 | 0.006 |
| 20313 | A_33_P3234641       | 0.236 | 0.032 | 0.137 | 0.012 | 0.582 | -0.781 | 0.007 |
| 28473 | ST13                | 1.142 | 0.218 | 0.665 | 0.039 | 0.582 | -0.780 | 0.020 |
| 39349 | RPS29               | 0.228 | 0.028 | 0.133 | 0.017 | 0.583 | -0.778 | 0.008 |
| 40119 | RPS21               | 0.286 | 0.026 | 0.167 | 0.021 | 0.584 | -0.777 | 0.003 |
| 27981 | PTPN2               | 1.410 | 0.075 | 0.828 | 0.128 | 0.587 | -0.769 | 0.002 |
| 24808 | RPS29               | 0.223 | 0.038 | 0.132 | 0.005 | 0.589 | -0.763 | 0.015 |
| 38664 | RPL28               | 1.096 | 0.059 | 0.647 | 0.068 | 0.590 | -0.760 | 0.001 |
| 10998 | LOC390282           | 1.072 | 0.052 | 0.634 | 0.066 | 0.592 | -0.757 | 0.001 |
| 32230 | GAPDH               | 1.342 | 0.140 | 0.795 | 0.083 | 0.593 | -0.755 | 0.004 |
| 3605  | ATP5G2              | 1.226 | 0.076 | 0.727 | 0.090 | 0.593 | -0.754 | 0.002 |
| 4970  | GAPDH               | 1.328 | 0.091 | 0.787 | 0.075 | 0.593 | -0.754 | 0.001 |
| 36986 | RABGGTB             | 0.817 | 0.161 | 0.485 | 0.058 | 0.594 | -0.752 | 0.029 |
| 28337 | RPSAP52             | 0.612 | 0.073 | 0.364 | 0.072 | 0.594 | -0.750 | 0.014 |
| 20633 | MTHFD2              | 1.284 | 0.159 | 0.768 | 0.037 | 0.598 | -0.742 | 0.005 |
| 16546 | NPM1                | 1.342 | 0.065 | 0.803 | 0.100 | 0.598 | -0.741 | 0.001 |
| 10136 | RPUSD4              | 1.277 | 0.169 | 0.764 | 0.095 | 0.598 | -0.741 | 0.010 |
| 19308 | OBFC2A              | 0.981 | 0.083 | 0.587 | 0.072 | 0.599 | -0.740 | 0.003 |
| 17465 | NOB1                | 1.400 | 0.117 | 0.839 | 0.134 | 0.599 | -0.739 | 0.005 |
| 37375 | CSNK2A2             | 1.285 | 0.148 | 0.772 | 0.102 | 0.601 | -0.735 | 0.008 |
| 8898  | A_33_P3262890       | 0.560 | 0.055 | 0.337 | 0.065 | 0.602 | -0.733 | 0.010 |
| 30296 | BM701600            | 0.451 | 0.055 | 0.272 | 0.057 | 0.603 | -0.730 | 0.017 |
| 19752 | MTHFD2              | 1.317 | 0.223 | 0.796 | 0.034 | 0.604 | -0.727 | 0.016 |
| 561   | RPL36               | 0.525 | 0.056 | 0.317 | 0.052 | 0.604 | -0.726 | 0.009 |
| 43018 | GAPDH               | 1.281 | 0.114 | 0.775 | 0.091 | 0.605 | -0.725 | 0.004 |
| 20087 | GAPDH               | 1.333 | 0.076 | 0.807 | 0.061 | 0.605 | -0.724 | 0.001 |
| 6189  | GAPDH               | 1.327 | 0.081 | 0.804 | 0.071 | 0.606 | -0.723 | 0.001 |

Table S1. Host mRNAs inhibited by Torin1

|       |                     |       |       |       |       |       |        |       |
|-------|---------------------|-------|-------|-------|-------|-------|--------|-------|
| 27211 | GAPDH               | 1.316 | 0.084 | 0.797 | 0.081 | 0.606 | -0.723 | 0.002 |
| 34331 | BC070327            | 0.493 | 0.026 | 0.299 | 0.070 | 0.607 | -0.721 | 0.011 |
| 21150 | UBXN8               | 0.978 | 0.010 | 0.594 | 0.056 | 0.607 | -0.720 | 0.000 |
| 25885 | GAPDH               | 1.349 | 0.097 | 0.820 | 0.066 | 0.608 | -0.719 | 0.001 |
| 28714 | A_33_P3246244       | 0.527 | 0.051 | 0.322 | 0.088 | 0.610 | -0.712 | 0.025 |
| 30857 | SNRPE               | 1.235 | 0.085 | 0.755 | 0.178 | 0.611 | -0.711 | 0.013 |
| 6520  | RPSA                | 0.564 | 0.057 | 0.345 | 0.070 | 0.612 | -0.709 | 0.014 |
| 14879 | GAPDH               | 1.334 | 0.096 | 0.818 | 0.063 | 0.613 | -0.706 | 0.001 |
| 36886 | NOB1                | 1.306 | 0.156 | 0.801 | 0.147 | 0.613 | -0.705 | 0.015 |
| 19663 | EIF3M               | 1.446 | 0.144 | 0.888 | 0.124 | 0.614 | -0.704 | 0.007 |
| 33035 | ENST0000026929<br>0 | 0.951 | 0.049 | 0.584 | 0.075 | 0.615 | -0.702 | 0.002 |
| 4014  | MTHFD2              | 1.295 | 0.157 | 0.797 | 0.021 | 0.615 | -0.700 | 0.006 |
| 29111 | NP100974            | 0.463 | 0.054 | 0.285 | 0.073 | 0.616 | -0.699 | 0.027 |
| 13490 | RPL22               | 0.750 | 0.130 | 0.463 | 0.079 | 0.616 | -0.698 | 0.030 |
| 28457 | AMD1                | 1.348 | 0.021 | 0.834 | 0.129 | 0.618 | -0.694 | 0.002 |
| 20988 | RBMX                | 1.391 | 0.272 | 0.861 | 0.126 | 0.619 | -0.692 | 0.037 |
| 15672 | SSR4                | 1.418 | 0.070 | 0.878 | 0.259 | 0.619 | -0.692 | 0.025 |
| 42731 | NOB1                | 1.269 | 0.140 | 0.787 | 0.149 | 0.620 | -0.689 | 0.015 |
| 7784  | CDCA7               | 0.771 | 0.116 | 0.479 | 0.052 | 0.621 | -0.687 | 0.016 |
| 20302 | TOM1L1              | 1.004 | 0.196 | 0.624 | 0.030 | 0.621 | -0.687 | 0.029 |
| 10771 | A_33_P3238461       | 0.280 | 0.062 | 0.174 | 0.011 | 0.622 | -0.685 | 0.044 |
| 1943  | A_33_P3230073       | 0.984 | 0.149 | 0.613 | 0.098 | 0.623 | -0.683 | 0.023 |
| 101   | MTHFD2              | 1.346 | 0.162 | 0.839 | 0.050 | 0.623 | -0.682 | 0.007 |
| 7864  | NOB1                | 1.297 | 0.119 | 0.810 | 0.150 | 0.625 | -0.679 | 0.012 |
| 19327 | ZNF239              | 0.929 | 0.107 | 0.581 | 0.022 | 0.625 | -0.678 | 0.005 |
| 20807 | LETMD1              | 0.920 | 0.067 | 0.577 | 0.090 | 0.627 | -0.674 | 0.006 |
| 19609 | TAF1D               | 0.547 | 0.029 | 0.343 | 0.019 | 0.627 | -0.673 | 0.001 |
| 6843  | MTA1                | 0.857 | 0.150 | 0.539 | 0.043 | 0.629 | -0.668 | 0.024 |
| 8236  | SFRS3               | 1.742 | 0.188 | 1.097 | 0.117 | 0.630 | -0.666 | 0.007 |
| 22385 | RPS15               | 0.728 | 0.068 | 0.459 | 0.105 | 0.630 | -0.666 | 0.020 |
| 13432 | CNIH                | 1.170 | 0.044 | 0.738 | 0.066 | 0.631 | -0.665 | 0.001 |
| 8831  | TLN2                | 0.914 | 0.066 | 0.580 | 0.087 | 0.634 | -0.658 | 0.006 |
| 1084  | NOB1                | 1.367 | 0.073 | 0.866 | 0.132 | 0.634 | -0.658 | 0.005 |
| 38522 | LOC730107           | 1.291 | 0.068 | 0.820 | 0.211 | 0.635 | -0.654 | 0.021 |
| 44918 | PFDN5               | 1.180 | 0.110 | 0.750 | 0.146 | 0.636 | -0.654 | 0.015 |
| 32534 | NOB1                | 1.323 | 0.139 | 0.841 | 0.145 | 0.636 | -0.653 | 0.014 |
| 15046 | LETMD1              | 0.929 | 0.090 | 0.591 | 0.099 | 0.636 | -0.652 | 0.012 |
| 17937 | MTHFD2              | 1.270 | 0.144 | 0.808 | 0.042 | 0.636 | -0.652 | 0.006 |
| 19945 | MTHFD2              | 1.297 | 0.186 | 0.827 | 0.091 | 0.638 | -0.648 | 0.017 |
| 10153 | SERPINB1            | 1.377 | 0.108 | 0.879 | 0.038 | 0.639 | -0.647 | 0.002 |
| 15712 | VEZT                | 1.144 | 0.086 | 0.731 | 0.086 | 0.639 | -0.646 | 0.004 |
| 32527 | A_33_P3368636       | 1.349 | 0.117 | 0.862 | 0.112 | 0.639 | -0.646 | 0.006 |
| 27653 | MRPL32              | 1.261 | 0.168 | 0.806 | 0.085 | 0.639 | -0.645 | 0.014 |
| 36434 | LETMD1              | 0.914 | 0.023 | 0.585 | 0.103 | 0.640 | -0.644 | 0.006 |
| 7250  | NPM1                | 1.201 | 0.228 | 0.769 | 0.128 | 0.641 | -0.643 | 0.046 |
| 22143 | MRRF                | 0.783 | 0.040 | 0.502 | 0.164 | 0.641 | -0.642 | 0.045 |
| 6903  | LETMD1              | 0.899 | 0.097 | 0.576 | 0.113 | 0.641 | -0.641 | 0.020 |
| 11904 | LETMD1              | 0.904 | 0.064 | 0.581 | 0.112 | 0.642 | -0.639 | 0.012 |
| 8366  | UBXN8               | 0.904 | 0.166 | 0.581 | 0.113 | 0.643 | -0.638 | 0.049 |
| 37210 | TPRKB               | 1.003 | 0.079 | 0.647 | 0.183 | 0.645 | -0.633 | 0.036 |
| 16788 | CLEC2D              | 1.439 | 0.079 | 0.929 | 0.120 | 0.646 | -0.631 | 0.004 |
| 11927 | NOB1                | 1.313 | 0.118 | 0.848 | 0.133 | 0.646 | -0.631 | 0.011 |
| 26526 | LETMD1              | 0.913 | 0.081 | 0.590 | 0.102 | 0.646 | -0.630 | 0.013 |

Table S1. Host mRNAs inhibited by Torin1

|       |               |       |       |       |       |       |        |       |
|-------|---------------|-------|-------|-------|-------|-------|--------|-------|
| 5331  | A_33_P3351615 | 0.291 | 0.050 | 0.189 | 0.018 | 0.647 | -0.628 | 0.028 |
| 20427 | C20orf199     | 0.207 | 0.028 | 0.134 | 0.014 | 0.647 | -0.627 | 0.016 |
| 5555  | MTHFD2        | 1.237 | 0.140 | 0.802 | 0.009 | 0.648 | -0.626 | 0.006 |
| 22039 | DYM           | 1.488 | 0.133 | 0.966 | 0.113 | 0.649 | -0.623 | 0.007 |
| 25578 | A_33_P3325009 | 0.232 | 0.034 | 0.151 | 0.012 | 0.650 | -0.622 | 0.017 |
| 32475 | POTEK         | 1.440 | 0.060 | 0.936 | 0.133 | 0.650 | -0.621 | 0.004 |
| 26033 | DPT           | 1.750 | 0.318 | 1.139 | 0.100 | 0.651 | -0.619 | 0.034 |
| 37564 | EIF4B         | 0.827 | 0.093 | 0.541 | 0.033 | 0.654 | -0.613 | 0.007 |
| 10808 | A_24_P340976  | 0.576 | 0.062 | 0.377 | 0.080 | 0.655 | -0.611 | 0.027 |
| 2050  | RPSA          | 0.586 | 0.043 | 0.384 | 0.071 | 0.655 | -0.610 | 0.014 |
| 42704 | SNRPE         | 1.151 | 0.111 | 0.755 | 0.093 | 0.656 | -0.608 | 0.009 |
| 4673  | CCDC34        | 1.283 | 0.140 | 0.842 | 0.138 | 0.656 | -0.608 | 0.018 |
| 39847 | RABGGTB       | 0.852 | 0.060 | 0.560 | 0.046 | 0.657 | -0.606 | 0.003 |
| 37654 | C17orf48      | 0.946 | 0.121 | 0.622 | 0.155 | 0.658 | -0.604 | 0.046 |
| 36775 | MRPL45        | 1.375 | 0.086 | 0.905 | 0.105 | 0.658 | -0.604 | 0.004 |
| 1306  | NOB1          | 1.311 | 0.102 | 0.864 | 0.114 | 0.659 | -0.601 | 0.007 |
| 14748 | A_33_P3381429 | 0.452 | 0.057 | 0.298 | 0.038 | 0.660 | -0.600 | 0.018 |
| 34082 | TOM1L1        | 0.978 | 0.063 | 0.647 | 0.035 | 0.662 | -0.595 | 0.001 |
| 39340 | MRPL45        | 1.354 | 0.120 | 0.897 | 0.164 | 0.663 | -0.594 | 0.018 |
| 44853 | C18orf21      | 0.882 | 0.124 | 0.585 | 0.070 | 0.663 | -0.594 | 0.023 |
| 31598 | C4orf14       | 0.952 | 0.115 | 0.631 | 0.030 | 0.663 | -0.593 | 0.009 |
| 5709  | SELK          | 0.915 | 0.097 | 0.607 | 0.105 | 0.663 | -0.593 | 0.020 |
| 39185 | RPL4          | 0.675 | 0.059 | 0.448 | 0.038 | 0.663 | -0.592 | 0.005 |
| 6521  | POTEE         | 1.558 | 0.067 | 1.034 | 0.112 | 0.663 | -0.592 | 0.002 |
| 30180 | SNX5          | 0.777 | 0.074 | 0.516 | 0.066 | 0.665 | -0.589 | 0.010 |
| 27445 | A_33_P3321923 | 1.066 | 0.068 | 0.709 | 0.084 | 0.665 | -0.588 | 0.005 |
| 20808 | NCRNA00174    | 0.378 | 0.007 | 0.252 | 0.064 | 0.666 | -0.587 | 0.027 |
| 36545 | MRPL32        | 1.108 | 0.098 | 0.737 | 0.067 | 0.666 | -0.587 | 0.006 |
| 12928 | CDK7          | 1.063 | 0.037 | 0.708 | 0.069 | 0.666 | -0.586 | 0.001 |
| 33285 | CREG1         | 1.172 | 0.084 | 0.781 | 0.058 | 0.666 | -0.586 | 0.003 |
| 2575  | ATP5O         | 1.302 | 0.090 | 0.868 | 0.146 | 0.667 | -0.585 | 0.012 |
| 37147 | LETMD1        | 0.895 | 0.098 | 0.597 | 0.076 | 0.667 | -0.584 | 0.014 |
| 25071 | GCSH          | 1.012 | 0.064 | 0.675 | 0.033 | 0.667 | -0.584 | 0.001 |
| 29103 | MRPL10        | 1.402 | 0.026 | 0.937 | 0.143 | 0.668 | -0.582 | 0.005 |
| 31783 | MRPL45        | 1.321 | 0.159 | 0.883 | 0.116 | 0.668 | -0.582 | 0.018 |
| 13359 | SLC41A3       | 1.284 | 0.068 | 0.859 | 0.088 | 0.669 | -0.580 | 0.003 |
| 20118 | CASKIN1       | 0.831 | 0.025 | 0.556 | 0.074 | 0.670 | -0.578 | 0.004 |
| 19542 | COX7C         | 0.790 | 0.061 | 0.529 | 0.084 | 0.670 | -0.578 | 0.012 |
| 32620 | LOC100134235  | 1.309 | 0.121 | 0.877 | 0.204 | 0.670 | -0.578 | 0.034 |
| 8238  | A_33_P3299436 | 0.795 | 0.089 | 0.533 | 0.071 | 0.670 | -0.577 | 0.016 |
| 7238  | FLJ45445      | 0.641 | 0.115 | 0.430 | 0.035 | 0.671 | -0.577 | 0.038 |
| 42889 | TUBA1C        | 1.247 | 0.162 | 0.837 | 0.153 | 0.671 | -0.575 | 0.033 |
| 6044  | TMEM97        | 1.579 | 0.128 | 1.060 | 0.037 | 0.671 | -0.575 | 0.002 |
| 24221 | ATP5H         | 1.545 | 0.133 | 1.038 | 0.086 | 0.672 | -0.574 | 0.005 |
| 33769 | COX7C         | 0.777 | 0.093 | 0.522 | 0.103 | 0.672 | -0.573 | 0.034 |
| 12044 | NMI           | 1.717 | 0.260 | 1.155 | 0.135 | 0.672 | -0.573 | 0.029 |
| 42080 | RPS2P32       | 0.448 | 0.028 | 0.301 | 0.019 | 0.673 | -0.572 | 0.002 |
| 8893  | TPM4          | 1.758 | 0.314 | 1.184 | 0.117 | 0.673 | -0.571 | 0.041 |
| 34654 | TBCA          | 0.840 | 0.117 | 0.566 | 0.077 | 0.673 | -0.571 | 0.027 |
| 1898  | TOM1L1        | 1.009 | 0.118 | 0.681 | 0.050 | 0.674 | -0.568 | 0.011 |
| 31957 | ZFAND1        | 0.842 | 0.139 | 0.568 | 0.023 | 0.675 | -0.567 | 0.029 |
| 27685 | GTF2F2        | 1.697 | 0.132 | 1.146 | 0.126 | 0.675 | -0.567 | 0.006 |
| 8428  | MTHFD2        | 1.216 | 0.098 | 0.821 | 0.067 | 0.675 | -0.566 | 0.005 |

Table S1. Host mRNAs inhibited by Torin1

|       |               |       |       |       |       |       |        |       |
|-------|---------------|-------|-------|-------|-------|-------|--------|-------|
| 23541 | PNRC1         | 1.144 | 0.080 | 0.773 | 0.095 | 0.676 | -0.566 | 0.007 |
| 14793 | MRPL45        | 1.365 | 0.150 | 0.923 | 0.089 | 0.676 | -0.565 | 0.012 |
| 30919 | OLA1          | 1.466 | 0.073 | 0.992 | 0.194 | 0.676 | -0.564 | 0.017 |
| 23453 | ZSWIM7        | 0.653 | 0.023 | 0.441 | 0.107 | 0.677 | -0.564 | 0.029 |
| 41101 | PCBP2         | 1.206 | 0.178 | 0.817 | 0.038 | 0.677 | -0.562 | 0.021 |
| 2627  | NMI           | 1.773 | 0.291 | 1.201 | 0.144 | 0.677 | -0.562 | 0.038 |
| 28487 | COX7C         | 0.780 | 0.071 | 0.529 | 0.093 | 0.678 | -0.562 | 0.020 |
| 32728 | EIF4A2        | 0.852 | 0.123 | 0.579 | 0.065 | 0.679 | -0.558 | 0.027 |
| 10411 | C18orf21      | 0.836 | 0.104 | 0.569 | 0.064 | 0.681 | -0.554 | 0.019 |
| 8074  | P704P         | 1.359 | 0.059 | 0.926 | 0.102 | 0.681 | -0.554 | 0.003 |
| 33351 | A_33_P3325011 | 0.232 | 0.041 | 0.158 | 0.015 | 0.682 | -0.552 | 0.044 |
| 24606 | COX7C         | 0.774 | 0.070 | 0.528 | 0.086 | 0.682 | -0.552 | 0.018 |
| 28418 | LETMD1        | 0.839 | 0.060 | 0.572 | 0.103 | 0.682 | -0.551 | 0.018 |
| 20466 | MRPL32        | 1.116 | 0.055 | 0.764 | 0.038 | 0.684 | -0.548 | 0.001 |
| 28000 | C10orf78      | 1.433 | 0.135 | 0.980 | 0.118 | 0.684 | -0.548 | 0.012 |
| 18043 | MRPL45        | 1.321 | 0.164 | 0.904 | 0.104 | 0.685 | -0.547 | 0.021 |
| 35097 | AK130930      | 0.487 | 0.029 | 0.333 | 0.019 | 0.685 | -0.546 | 0.002 |
| 37646 | ATP5L2        | 1.192 | 0.023 | 0.816 | 0.188 | 0.685 | -0.546 | 0.027 |
| 35361 | SETDB1        | 1.615 | 0.136 | 1.107 | 0.055 | 0.685 | -0.545 | 0.004 |
| 14211 | FAM73B        | 1.254 | 0.211 | 0.860 | 0.063 | 0.686 | -0.544 | 0.036 |
| 28370 | MRPL32        | 1.068 | 0.026 | 0.733 | 0.084 | 0.686 | -0.544 | 0.003 |
| 33526 | LDHB          | 1.282 | 0.188 | 0.881 | 0.049 | 0.687 | -0.542 | 0.023 |
| 37214 | MEAF6         | 1.091 | 0.068 | 0.749 | 0.046 | 0.687 | -0.542 | 0.002 |
| 25021 | AMD1          | 1.101 | 0.093 | 0.758 | 0.160 | 0.688 | -0.540 | 0.033 |
| 34074 | LOC100131262  | 1.570 | 0.129 | 1.080 | 0.080 | 0.688 | -0.540 | 0.005 |
| 37575 | SLC9A5        | 0.789 | 0.064 | 0.543 | 0.120 | 0.689 | -0.538 | 0.035 |
| 34765 | GYG1          | 1.654 | 0.064 | 1.140 | 0.104 | 0.689 | -0.538 | 0.002 |
| 12824 | MEAF6         | 1.031 | 0.103 | 0.712 | 0.046 | 0.690 | -0.535 | 0.008 |
| 23103 | A_33_P3253832 | 1.589 | 0.082 | 1.097 | 0.189 | 0.690 | -0.535 | 0.014 |
| 1297  | C18orf21      | 0.883 | 0.120 | 0.610 | 0.096 | 0.690 | -0.534 | 0.037 |
| 4039  | NFU1          | 1.780 | 0.179 | 1.229 | 0.062 | 0.690 | -0.534 | 0.007 |
| 13375 | CIRBP         | 1.367 | 0.035 | 0.944 | 0.055 | 0.691 | -0.534 | 0.000 |
| 8886  | EIF3L         | 0.800 | 0.134 | 0.553 | 0.033 | 0.691 | -0.534 | 0.036 |
| 15383 | MRPL45        | 1.334 | 0.146 | 0.922 | 0.094 | 0.691 | -0.533 | 0.015 |
| 9138  | CERCAM        | 1.555 | 0.117 | 1.075 | 0.191 | 0.691 | -0.532 | 0.021 |
| 10831 | RBM3          | 1.371 | 0.192 | 0.949 | 0.117 | 0.692 | -0.530 | 0.031 |
| 42966 | COX7C         | 0.767 | 0.070 | 0.532 | 0.082 | 0.693 | -0.528 | 0.019 |
| 18904 | C18orf21      | 0.863 | 0.118 | 0.598 | 0.091 | 0.694 | -0.528 | 0.037 |
| 19909 | COX7C         | 0.761 | 0.073 | 0.528 | 0.079 | 0.694 | -0.527 | 0.020 |
| 27706 | NPC2          | 1.693 | 0.024 | 1.175 | 0.028 | 0.694 | -0.527 | 0.000 |
| 18549 | COX7C         | 0.764 | 0.075 | 0.530 | 0.074 | 0.694 | -0.527 | 0.019 |
| 1261  | C18orf21      | 0.884 | 0.124 | 0.613 | 0.081 | 0.694 | -0.527 | 0.034 |
| 14683 | CBR4          | 1.266 | 0.032 | 0.879 | 0.143 | 0.694 | -0.526 | 0.010 |
| 38627 | PRTFDC1       | 1.090 | 0.142 | 0.758 | 0.138 | 0.695 | -0.524 | 0.044 |
| 29674 | DMTF1         | 0.430 | 0.032 | 0.299 | 0.021 | 0.696 | -0.523 | 0.004 |
| 15109 | MEAF6         | 1.028 | 0.072 | 0.716 | 0.039 | 0.697 | -0.522 | 0.003 |
| 9838  | SH3YL1        | 0.930 | 0.029 | 0.648 | 0.071 | 0.697 | -0.522 | 0.003 |
| 28258 | SLC25A37      | 0.822 | 0.090 | 0.573 | 0.049 | 0.697 | -0.522 | 0.013 |
| 32201 | NMI           | 1.731 | 0.283 | 1.207 | 0.150 | 0.697 | -0.520 | 0.047 |
| 43910 | COX7C         | 0.764 | 0.063 | 0.534 | 0.082 | 0.699 | -0.516 | 0.018 |
| 40808 | AVEN          | 1.440 | 0.159 | 1.007 | 0.183 | 0.699 | -0.516 | 0.036 |
| 27093 | MAGOHB        | 1.097 | 0.015 | 0.767 | 0.126 | 0.700 | -0.515 | 0.011 |
| 31808 | PDCD2         | 0.877 | 0.027 | 0.614 | 0.134 | 0.700 | -0.514 | 0.029 |

Table S1. Host mRNAs inhibited by Torin1

|              |                 |              |       |              |       |              |        |       |
|--------------|-----------------|--------------|-------|--------------|-------|--------------|--------|-------|
| <b>3282</b>  | <b>PRPF38A</b>  | <b>1.080</b> | 0.065 | <b>0.757</b> | 0.067 | <b>0.701</b> | -0.512 | 0.004 |
| <b>24807</b> | <b>R3HDM2</b>   | <b>0.929</b> | 0.106 | <b>0.652</b> | 0.060 | <b>0.702</b> | -0.511 | 0.017 |
| <b>27055</b> | <b>TOP1MT</b>   | <b>1.425</b> | 0.084 | <b>1.001</b> | 0.103 | <b>0.702</b> | -0.510 | 0.005 |
| <b>36923</b> | <b>SNRPE</b>    | <b>0.961</b> | 0.012 | <b>0.675</b> | 0.122 | <b>0.703</b> | -0.509 | 0.016 |
| <b>31754</b> | <b>MRPL45</b>   | <b>1.315</b> | 0.183 | <b>0.924</b> | 0.088 | <b>0.703</b> | -0.509 | 0.029 |
| <b>39320</b> | <b>CENPQ</b>    | <b>1.453</b> | 0.160 | <b>1.022</b> | 0.175 | <b>0.703</b> | -0.509 | 0.034 |
| <b>15392</b> | <b>RAB4A</b>    | <b>0.828</b> | 0.135 | <b>0.583</b> | 0.059 | <b>0.704</b> | -0.507 | 0.045 |
| <b>1389</b>  | <b>RAN</b>      | <b>1.419</b> | 0.168 | <b>0.999</b> | 0.101 | <b>0.704</b> | -0.507 | 0.021 |
| <b>30433</b> | <b>C18orf21</b> | <b>0.846</b> | 0.112 | <b>0.596</b> | 0.095 | <b>0.704</b> | -0.506 | 0.042 |
| <b>27000</b> | <b>MRPL45</b>   | <b>1.328</b> | 0.181 | <b>0.935</b> | 0.097 | <b>0.704</b> | -0.506 | 0.030 |
| <b>4543</b>  | <b>CHP</b>      | <b>1.199</b> | 0.132 | <b>0.845</b> | 0.045 | <b>0.704</b> | -0.506 | 0.012 |
| <b>33699</b> | <b>RSL24D1</b>  | <b>1.409</b> | 0.045 | <b>0.992</b> | 0.039 | <b>0.704</b> | -0.506 | 0.000 |
| <b>13926</b> | <b>UBE2V1</b>   | <b>1.073</b> | 0.041 | <b>0.758</b> | 0.015 | <b>0.706</b> | -0.502 | 0.000 |
| <b>32034</b> | <b>AVEN</b>     | <b>1.360</b> | 0.081 | <b>0.961</b> | 0.191 | <b>0.707</b> | -0.500 | 0.029 |

Table S2. Changes in HCMV mRNA translation with Torin1

| Gene         | NT TE | NT STDEV | Torin1 TE | Torin STDEV | Torin1/NT TE | pvalue |
|--------------|-------|----------|-----------|-------------|--------------|--------|
| <b>RL1</b>   | 0.541 | 0.133    | 0.562     | 0.171       | 1.039        | 0.8746 |
| <b>UL4</b>   | 0.356 | 0.055    | 0.410     | 0.080       | 1.151        | 0.3927 |
| <b>UL5</b>   | 0.381 | 0.046    | 0.433     | 0.067       | 1.137        | 0.3314 |
| <b>UL6</b>   | 0.658 | 0.044    | 0.678     | 0.011       | 1.031        | 0.4833 |
| <b>UL10</b>  | 0.902 | 0.167    | 0.805     | 0.078       | 0.892        | 0.4121 |
| <b>UL11</b>  | 0.810 | 0.057    | 0.746     | 0.326       | 0.922        | 0.7570 |
| <b>UL13</b>  | 1.144 | 0.126    | 1.179     | 0.215       | 1.030        | 0.8221 |
| <b>UL14</b>  | 1.413 | 0.129    | 1.500     | 0.240       | 1.061        | 0.6105 |
| <b>UL15A</b> | 2.160 | 0.275    | 2.293     | 0.349       | 1.061        | 0.6327 |
| <b>UL16</b>  | 0.848 | 0.112    | 0.861     | 0.153       | 1.015        | 0.9118 |
| <b>UL17</b>  | 0.671 | 0.129    | 0.411     | 0.166       | 0.613        | 0.0998 |
| <b>UL18</b>  | 0.441 | 0.067    | 0.464     | 0.062       | 1.052        | 0.6832 |
| <b>UL19</b>  | 0.705 | 0.043    | 0.684     | 0.068       | 0.971        | 0.6860 |
| <b>UL21A</b> | 0.739 | 0.022    | 0.773     | 0.067       | 1.046        | 0.4552 |
| <b>UL23</b>  | 0.696 | 0.049    | 0.733     | 0.067       | 1.053        | 0.4878 |
| <b>UL24</b>  | 0.743 | 0.082    | 0.685     | 0.031       | 0.921        | 0.3132 |
| <b>UL25</b>  | 1.065 | 0.018    | 1.340     | 0.125       | 1.259        | 0.0195 |
| <b>UL26</b>  | 0.982 | 0.217    | 0.843     | 0.015       | 0.858        | 0.3307 |
| <b>UL27</b>  | 0.758 | 0.279    | 0.642     | 0.276       | 0.847        | 0.6365 |
| <b>UL29</b>  | 0.664 | 0.089    | 0.820     | 0.237       | 1.234        | 0.3470 |
| <b>UL30</b>  | 1.189 | 0.313    | 1.157     | 0.084       | 0.973        | 0.8742 |
| <b>UL31</b>  | 0.878 | 0.133    | 1.072     | 0.332       | 1.222        | 0.3997 |
| <b>UL32</b>  | 1.063 | 0.622    | 0.935     | 0.136       | 0.880        | 0.7457 |
| <b>UL33</b>  | 1.649 | 0.363    | 1.592     | 0.203       | 0.965        | 0.8229 |
| <b>UL34</b>  | 1.168 | 0.019    | 1.552     | 0.073       | 1.330        | 0.0009 |
| <b>UL35</b>  | 0.867 | 0.131    | 1.108     | 0.105       | 1.277        | 0.0681 |
| <b>UL37</b>  | 0.671 | 0.061    | 0.689     | 0.038       | 1.028        | 0.6769 |
| <b>UL38</b>  | 0.917 | 0.052    | 1.046     | 0.122       | 1.141        | 0.1672 |
| <b>UL40</b>  | 1.152 | 0.049    | 1.049     | 0.078       | 0.910        | 0.1222 |
| <b>UL41A</b> | 1.015 | 0.051    | 1.151     | 0.453       | 1.134        | 0.6324 |
| <b>UL42</b>  | 1.222 | 0.104    | 1.217     | 0.215       | 0.996        | 0.9719 |
| <b>UL43</b>  | 0.976 | 0.157    | 0.995     | 0.343       | 1.019        | 0.9346 |
| <b>UL44</b>  | 1.438 | 0.309    | 1.345     | 0.236       | 0.935        | 0.6993 |
| <b>UL45</b>  | 0.880 | 0.087    | 0.973     | 0.123       | 1.106        | 0.3429 |
| <b>UL46</b>  | 0.814 | 0.323    | 0.841     | 0.071       | 1.033        | 0.8935 |
| <b>UL47</b>  | 0.652 | 0.120    | 0.771     | 0.246       | 1.182        | 0.4950 |
| <b>UL48</b>  | 0.660 | 0.006    | 0.975     | 0.341       | 1.478        | 0.1845 |
| <b>UL48A</b> | 1.237 | 0.156    | 1.209     | 0.090       | 0.977        | 0.8018 |
| <b>UL49</b>  | 0.813 | 0.059    | 0.767     | 0.119       | 0.943        | 0.5784 |
| <b>UL50</b>  | 0.991 | 0.347    | 0.904     | 0.154       | 0.912        | 0.7112 |

Table S2. Changes in HCMV mRNA translation with Torin1

|               |       |       |       |       |       |        |
|---------------|-------|-------|-------|-------|-------|--------|
| <b>UL51</b>   | 0.811 | 0.148 | 0.837 | 0.038 | 1.032 | 0.7844 |
| <b>UL52</b>   | 1.021 | 0.147 | 1.021 | 0.271 | 1.000 | 0.9984 |
| <b>UL53</b>   | 1.837 | 0.400 | 1.455 | 0.328 | 0.792 | 0.2704 |
| <b>UL57</b>   | 0.439 | 0.046 | 0.480 | 0.147 | 1.095 | 0.6635 |
| <b>UL69</b>   | 0.704 | 0.014 | 0.623 | 0.133 | 0.886 | 0.3550 |
| <b>UL71</b>   | 1.211 | 0.021 | 1.342 | 0.081 | 1.109 | 0.0517 |
| <b>UL72</b>   | 0.515 | 0.049 | 0.587 | 0.103 | 1.139 | 0.3390 |
| <b>UL73</b>   | 1.166 | 0.119 | 1.112 | 0.332 | 0.954 | 0.8058 |
| <b>UL74A</b>  | 1.094 | 0.074 | 1.089 | 0.300 | 0.996 | 0.9794 |
| <b>UL76</b>   | 0.826 | 0.085 | 0.824 | 0.332 | 0.998 | 0.9929 |
| <b>UL78</b>   | 1.454 | 0.195 | 1.875 | 0.357 | 1.290 | 0.1472 |
| <b>UL80</b>   | 1.656 | 0.168 | 2.062 | 0.783 | 1.245 | 0.4298 |
| <b>UL80.5</b> | 1.648 | 0.159 | 1.736 | 0.238 | 1.256 | 0.4086 |
| <b>UL82</b>   | 0.924 | 0.109 | 1.130 | 0.440 | 1.222 | 0.4762 |
| <b>UL83</b>   | 0.821 | 0.071 | 1.066 | 0.139 | 1.298 | 0.0532 |
| <b>UL85</b>   | 0.782 | 0.103 | 0.853 | 0.214 | 1.090 | 0.6333 |
| <b>UL86</b>   | 1.098 | 0.274 | 1.281 | 0.411 | 1.166 | 0.5571 |
| <b>UL87</b>   | 0.607 | 0.061 | 0.597 | 0.156 | 0.982 | 0.9178 |
| <b>UL89</b>   | 0.673 | 0.083 | 0.689 | 0.240 | 1.023 | 0.9198 |
| <b>UL91</b>   | 0.505 | 0.206 | 0.464 | 0.073 | 0.920 | 0.7649 |
| <b>UL92</b>   | 1.016 | 0.070 | 0.953 | 0.242 | 0.939 | 0.6913 |
| <b>UL93</b>   | 0.625 | 0.106 | 0.747 | 0.332 | 1.195 | 0.5780 |
| <b>UL94</b>   | 0.950 | 0.073 | 1.098 | 0.382 | 1.157 | 0.5444 |
| <b>UL95</b>   | 0.688 | 0.077 | 0.845 | 0.246 | 1.228 | 0.3519 |
| <b>UL96</b>   | 1.318 | 0.468 | 1.299 | 0.313 | 0.986 | 0.9570 |
| <b>UL97</b>   | 0.578 | 0.080 | 0.664 | 0.265 | 1.149 | 0.6178 |
| <b>UL98</b>   | 0.941 | 0.255 | 1.314 | 0.291 | 1.395 | 0.1709 |
| <b>UL99</b>   | 0.978 | 0.108 | 1.220 | 0.078 | 1.247 | 0.0344 |
| <b>UL100</b>  | 0.805 | 0.131 | 0.732 | 0.067 | 0.909 | 0.4362 |
| <b>UL102</b>  | 0.929 | 0.048 | 1.022 | 0.092 | 1.099 | 0.1982 |
| <b>UL103</b>  | 0.665 | 0.121 | 0.732 | 0.035 | 1.101 | 0.4101 |
| <b>UL105</b>  | 1.001 | 0.076 | 0.987 | 0.290 | 0.986 | 0.9391 |
| <b>UL111A</b> | 0.520 | 0.041 | 0.501 | 0.081 | 0.962 | 0.7248 |
| <b>UL112</b>  | 0.728 | 0.107 | 0.881 | 0.307 | 1.211 | 0.4594 |
| <b>UL115</b>  | 0.496 | 0.136 | 0.448 | 0.037 | 0.903 | 0.5868 |
| <b>UL119</b>  | 0.630 | 0.367 | 0.489 | 0.133 | 0.776 | 0.5645 |
| <b>UL121</b>  | 0.111 | 0.021 | 0.137 | 0.024 | 1.236 | 0.2253 |
| <b>UL124</b>  | 0.740 | 0.214 | 0.652 | 0.204 | 0.881 | 0.6329 |
| <b>IRS1</b>   | 0.593 | 0.135 | 0.664 | 0.084 | 1.120 | 0.4831 |
| <b>US1</b>    | 0.834 | 0.107 | 1.280 | 0.200 | 1.535 | 0.0269 |
| <b>US7</b>    | 0.182 | 0.049 | 0.224 | 0.049 | 1.228 | 0.3581 |
| <b>US9</b>    | 0.853 | 0.108 | 0.692 | 0.050 | 0.812 | 0.0797 |



Table S2. Changes in HCMV mRNA translation with Torin1

|              |       |       |       |       |       |        |
|--------------|-------|-------|-------|-------|-------|--------|
| <b>US12</b>  | 0.981 | 0.101 | 0.804 | 0.223 | 0.820 | 0.2797 |
| <b>US13</b>  | 0.821 | 0.337 | 0.634 | 0.129 | 0.772 | 0.4196 |
| <b>US14</b>  | 0.666 | 0.090 | 0.670 | 0.115 | 1.007 | 0.9577 |
| <b>US15</b>  | 0.642 | 0.162 | 0.738 | 0.157 | 1.150 | 0.4991 |
| <b>US16</b>  | 0.514 | 0.081 | 0.587 | 0.227 | 1.141 | 0.6286 |
| <b>US17</b>  | 0.722 | 0.063 | 0.799 | 0.169 | 1.106 | 0.5020 |
| <b>US18</b>  | 1.062 | 0.175 | 0.765 | 0.060 | 0.720 | 0.0499 |
| <b>US19</b>  | 0.665 | 0.219 | 0.593 | 0.025 | 0.892 | 0.6011 |
| <b>US20</b>  | 0.501 | 0.042 | 0.496 | 0.041 | 0.990 | 0.8875 |
| <b>US21</b>  | 0.565 | 0.078 | 0.604 | 0.080 | 1.069 | 0.5797 |
| <b>US24</b>  | 0.504 | 0.045 | 0.585 | 0.067 | 1.162 | 0.1540 |
| <b>US27</b>  | 0.668 | 0.064 | 0.766 | 0.089 | 1.147 | 0.1957 |
| <b>US28</b>  | 0.907 | 0.118 | 1.051 | 0.051 | 1.159 | 0.1245 |
| <b>US29</b>  | 1.384 | 0.378 | 1.169 | 0.180 | 0.844 | 0.4239 |
| <b>US30</b>  | 1.714 | 1.025 | 1.260 | 0.284 | 0.735 | 0.5004 |
| <b>US31</b>  | 0.966 | 0.092 | 0.988 | 0.160 | 1.022 | 0.8485 |
| <b>US32</b>  | 1.250 | 0.097 | 1.282 | 0.208 | 1.026 | 0.8208 |
| <b>US34</b>  | 0.790 | 0.074 | 0.863 | 0.053 | 1.092 | 0.2379 |
| <b>US34A</b> | 0.953 | 0.060 | 1.035 | 0.052 | 1.086 | 0.1472 |
| <b>TRS1</b>  | 0.669 | 0.102 | 0.748 | 0.241 | 1.118 | 0.6286 |
